# Supplementary material
Source: MDPI journal article supplement (https://www.mdpi.com/2073-4344/13/2/262)
Supplement: s1 [file s1]

Supplementary material

# One step catalytic conversion of polysaccharides in *Ulva prolifera* to Lactic Acid and value-added chemicals

*Mingyu Li, Yingdong Zhou, Changwei Hu\**

Key Laboratory of Green Chemistry and Technology, Ministry of Education, College of  
Chemistry, Sichuan University, Chengdu, Sichuan 610064, China

## **2. Materials and methods**

### **2.3 Liquid products analysis**

The liquid products in the aqueous phase filtrate were quantitatively analyzed by HPLC (waters e2695), equipped with an aminex column (Bio-Rad, HPX-87H, 300 mm × 7.8 mm) and a Refractive Index detector (Shodex, RI-101).

The molecular weight distribution of liquid products was analyzed using a gel permeation chromatography (GPC, Agilent, 1260 Infinity) equipped with a RI detector and a PL aquagel-OH column (Agilent).

ESI-MS (Shimadzu, LCMS-IT-TOF) analysis of liquid products was performed to determine the possible chemical structure of monomeric compounds and the oligomeric.

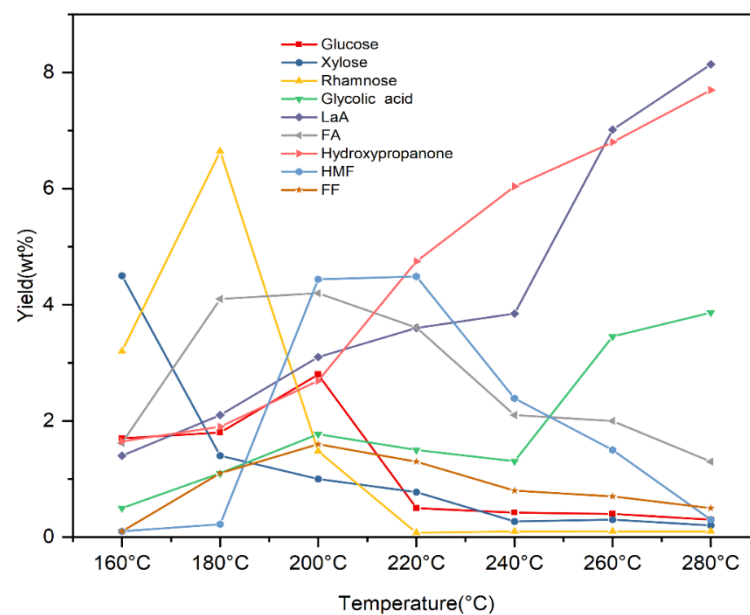

**Figure S1.** Yields of small molecular products from hydrothermal conversion of *U. prolifera* at different temperatures without  $\text{YCl}_3$ . Reaction conditions: 1.0 g of *U. prolifera*, 100 mL water, 2 MPa  $\text{N}_2$ , 1 h

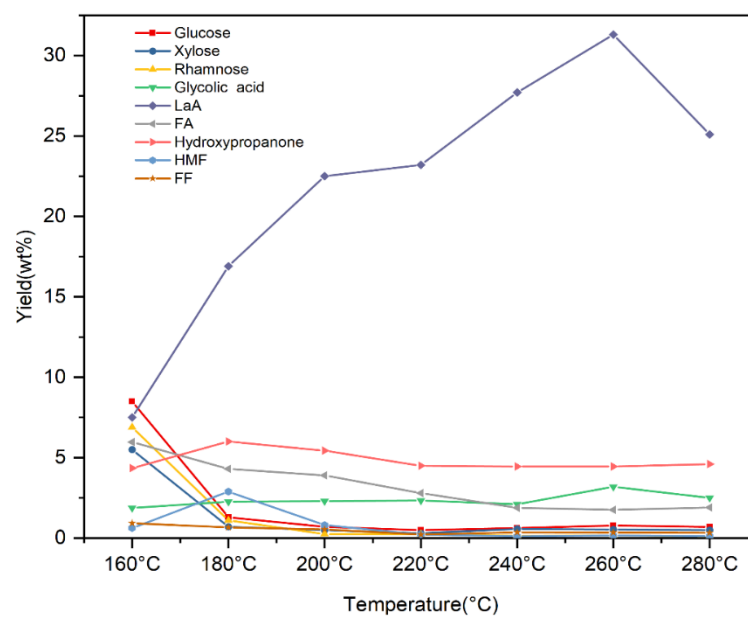

**Figure S2.** Yields of small molecular products from hydrothermal conversion of *U. prolifera* at different temperatures with  $\text{YCl}_3$ . Reaction conditions: 1.0 g of *U. prolifera*, 100 mL water, 13 mmol/L  $\text{YCl}_3$  if used, 2 MPa  $\text{N}_2$ , 1 h

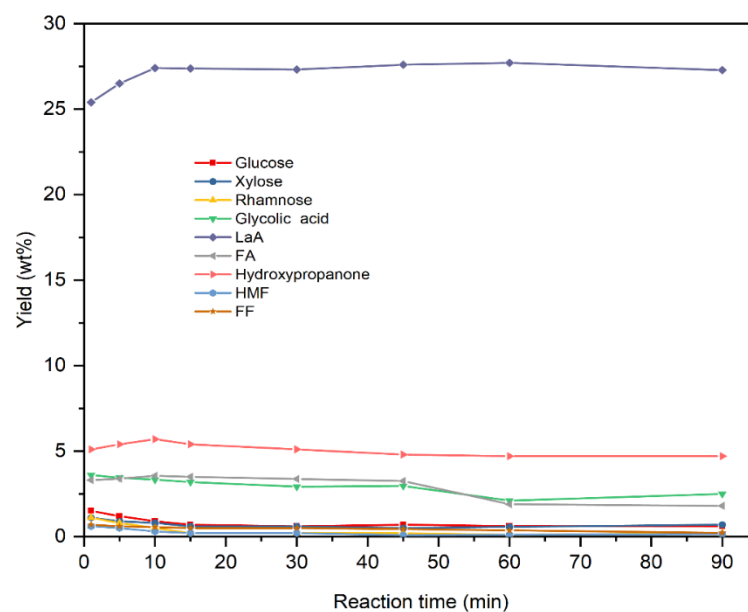

**Figure S3.** Yields of small molecular products from hydrothermal conversion of *U. prolifera* at different reaction time with  $\text{YCl}_3$ . Reaction conditions: 1.0 g of *U. prolifera*, 100 mL water, 13 mmol/L  $\text{YCl}_3$  if used, 2 MPa  $\text{N}_2$ , 240 °C

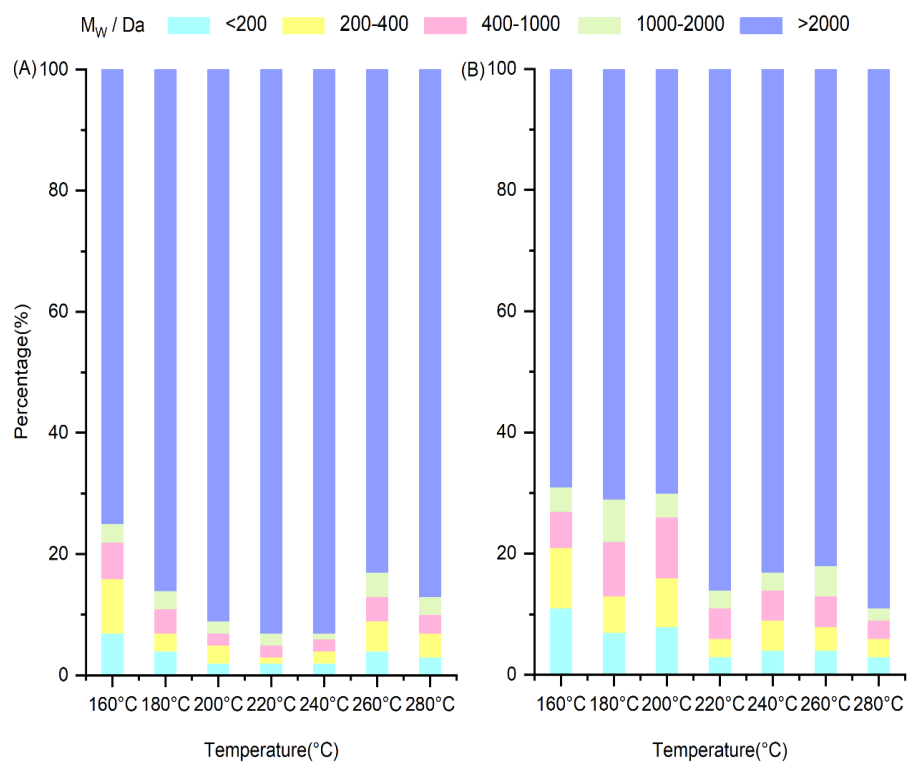

**Figure S4.** (A) Molecular weight distribution of liquid products from the conversion of *U. prolifera* at different temperatures with YCl<sub>3</sub>. Reaction conditions: 1.0 g of *U. prolifera*, 100 mL water, 13 mmol/L YCl<sub>3</sub> if used, 2 MPa N<sub>2</sub>, 1 h. (B) Molecular weight distribution of liquid products from the conversion of *U. prolifera* at different temperatures without YCl<sub>3</sub>

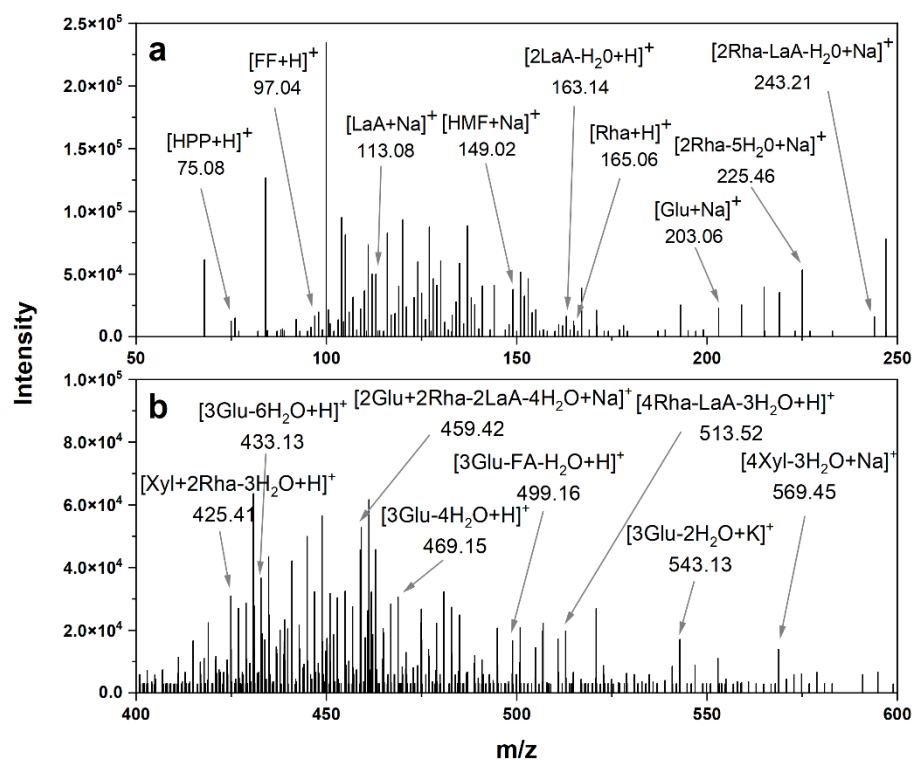

**Figure S5.** ESI-MS spectra (cation positive mode) of liquid products phase from the conversion of *U. prolifera* in the presence of 13mmol/L YCl<sub>3</sub> at 240 °C

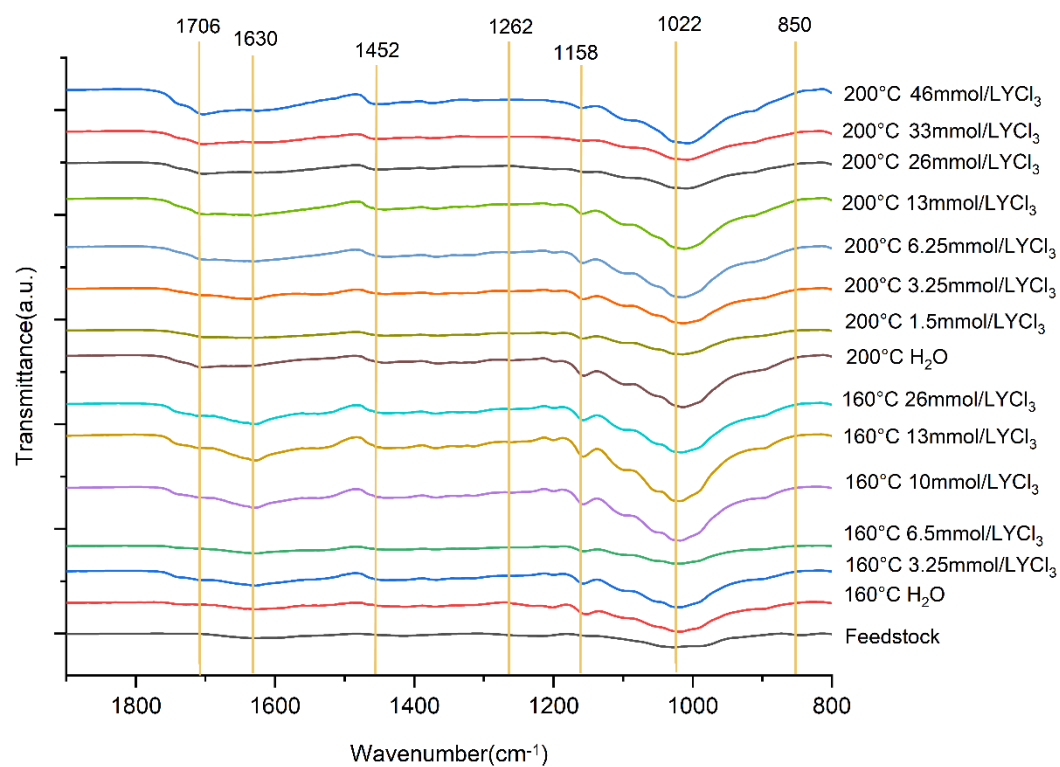

**Figure S6.** FT-IR spectra of *U. prolifera* feedstock and solid residue. Dry at 80 °C for 12 hours.



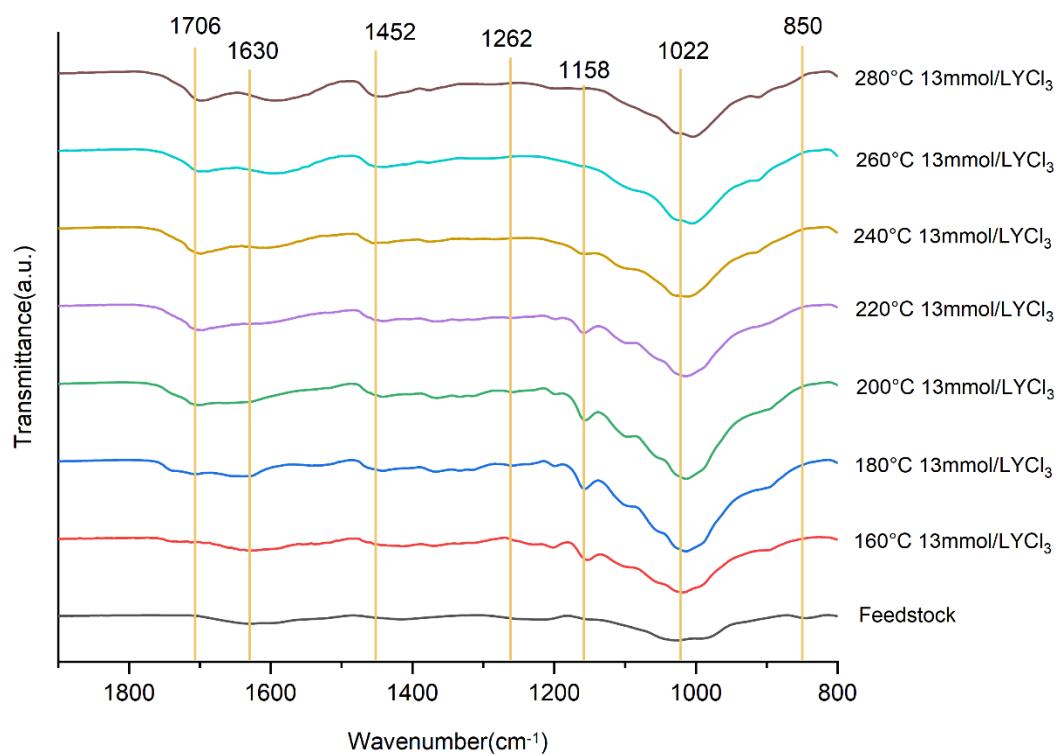

**Figure S7.** FT-IR spectra of *U. prolifera* feedstock and solid residue at different temperatures with 13 mmol/L  $\text{YCl}_3$ . Dry at 80 °C for 12 hours.

**Table S1.** Comparison of advantages and disadvantages of lactic acid prepared by different hydrothermal catalytic methods

| Raw material                  | Catalyst         | Time   | Space time<br>yield(%/min) | Advantages                                                                                          | Disadvantages                       | Reference |
|-------------------------------|------------------|--------|----------------------------|-----------------------------------------------------------------------------------------------------|-------------------------------------|-----------|
| microcrystalline<br>cellulose | 400ppm-Ni        | 2 min  | 3.1                        | High space time yield, fast,<br>reuse                                                               | Pure cellulose, complex<br>process  | [1]       |
| xylan                         | ZrO <sub>2</sub> | 40 min | 0.8                        | Low cost, simple operation,<br>reuse                                                                | Pure xylan, low space time<br>yield | [2]       |
| rice straw                    | NiO, NaOH        | 2 h    | 0.5                        | Real biomass, high yield,<br>simultaneous fractionation and<br>conversion, low cost                 | Strong alkali, long time            | [3]       |
| corn stover                   | YCl <sub>3</sub> | 1 h    | 1.1                        | Real biomass, high selectivity,<br>simultaneous fractionation and<br>conversion, widely application | Difficult to reuse and<br>separate  | [4]       |
| <i>Ulva prolifera</i>         | YCl <sub>3</sub> | 10 min | 3.1                        | Real biomass, simultaneous<br>fractionation and conversion,<br>high space time yield, low cost      | Difficult to reuse and<br>separate  | This work |

## References

- [1] L. Kong, G. Li, H. Wang, W. He, F. Ling, Hydrothermal catalytic conversion of biomass for lactic acid production, *Journal of Chemical Technology & Biotechnology*, 83 (2008) 383-388.  
<https://doi.org/10.1002/jctb.1797>
- [2] L. Yang, J. Su, S. Carl, J.G. Lynam, X. Yang, H. Lin, Catalytic conversion of hemicellulosic biomass to lactic acid in pH neutral aqueous phase media, *Applied Catalysis B: Environmental*, 162 (2015) 149-157.  
<https://doi.org/10.1016/j.apcatb.2014.06.025>
- [3] R. Younas, S. Zhang, L. Zhang, G. Luo, K. Chen, L. Cao, Y. Liu, S. Hao, Lactic acid production from rice straw in alkaline hydrothermal conditions in presence of NiO nanoplates, *Catalysis Today*, 274 (2016) 40-48.  
<https://doi.org/10.1016/j.cattod.2016.03.052>
- [4] S. Xu, Y. Wu, J. Li, T. He, Y. Xiao, C. Zhou, C. Hu, Directing the Simultaneous Conversion of Hemicellulose and Cellulose in Raw Biomass to Lactic Acid, *ACS Sustainable Chemistry & Engineering*, 8 (2020) 4244-4255.  
<https://doi.org/10.1021/acssuschemeng.9b07552>

**Table S2.** The content of main metallic elements in ash

| content (wt%) | Ca  | K   | Na  | Mg  | Fe  |
|---------------|-----|-----|-----|-----|-----|
| Ash           | 7.8 | 3.0 | 4.1 | 1.9 | 0.7 |

**Table S3.** The assignment of FT-IR peaks of *U. prolifera*

| Wavenumber (cm <sup>-1</sup> ) | Functional group | Vibration type of relative bond                 |
|--------------------------------|------------------|-------------------------------------------------|
| 1706                           | C=O              | Amino bonds in proteins                         |
| 1630                           | C=O              | Uronic acid in sulfated polysaccharides         |
| ~1452                          | C-O              | Uronic acid in sulfated polysaccharides         |
| ~1262                          | S=O              | Sulfate ester group in sulfated polysaccharides |
| ~1158                          | C-O-C            | Cellulose and hemicellulose                     |
| ~1022                          | C-O-C            | lignin                                          |
| 850                            | C-O-S            | Sulfate group in sulfated polysaccharides       |

**Table S4.** The content of main metallic elements in *Ulva prolifera* and Solid residue

| content (wt%)                                         | Ca  | K   | Na  | Mg  | Fe  |
|-------------------------------------------------------|-----|-----|-----|-----|-----|
| <i>Ulva prolifera</i>                                 | 2.1 | 0.8 | 1.1 | 0.5 | 0.2 |
| Solid residue<br>(200 °C, 26mmol/L YCl <sub>3</sub> ) | 4.3 | 0.7 | 0.8 | 1.2 | 0.4 |

**Table S5.** Yields of LaA (wt%) from separate hydrothermal conversion of xylose or rhamnose at different temperature with YCl<sub>3</sub>

| Temperature | rhamnose       | xylose         |
|-------------|----------------|----------------|
| 140 °C      | 9.8            | - <sup>a</sup> |
| 160 °C      | 38.2           | 8.3            |
| 180 °C      | 38.3           | 16.3           |
| 200 °C      | 37.5           | 28.7           |
| 220 °C      | - <sup>a</sup> | 36.5           |
| 240 °C      | - <sup>a</sup> | 35.2           |

-<sup>a</sup>: not tested

Reaction conditions: 1.0 g of rhamnose/ xylose, 100 mL water, 26 mmol/L YCl<sub>3</sub>, 2 MPa N<sub>2</sub>, 1h

**Table S6-1.** The average of the data in Figure 1

| Amount(mmol/L) | Glucose | Xylose | Rhamnose | Glycolic acid | LaA  | FA  | Hydroxypropanone | HMF | FF  |
|----------------|---------|--------|----------|---------------|------|-----|------------------|-----|-----|
| 0.0            | 0.9     | 4.5    | 3.2      | 0.5           | 1.4  | 1.6 | 1.7              | 0.1 | 0.1 |
| 3.3            | 1.5     | 4.8    | 11.2     | 0.9           | 1.7  | 3.2 | 1.9              | 0.1 | 0.4 |
| 6.5            | 2.1     | 5.1    | 10.9     | 1.2           | 3.1  | 3.9 | 3.0              | 0.3 | 0.8 |
| 10.0           | 7.1     | 5.4    | 7.7      | 1.4           | 6.7  | 4.6 | 4.4              | 0.5 | 0.9 |
| 13.0           | 8.5     | 5.5    | 6.9      | 1.9           | 7.5  | 4.7 | 4.3              | 0.6 | 0.9 |
| 26.0           | 9.2     | 4.8    | 2.0      | 2.1           | 11.8 | 4.8 | 4.9              | 1.5 | 1.0 |

**Table S6-2.** The standard deviation of the data in Figure 1

| Amount(mmol/L) | Glucose | Xylose | Rhamnose | Glycolic acid | LaA   | FA    | Hydroxypropanone | HMF   | FF    |
|----------------|---------|--------|----------|---------------|-------|-------|------------------|-------|-------|
| 0.0            | 0.058   | 0.058  | 0.100    | 0.058         | 0.058 | 0.090 | 0.175            | 0.000 | 0.000 |
| 3.3            | 0.058   | 0.058  | 0.104    | 0.101         | 0.058 | 0.114 | 0.079            | 0.053 | 0.102 |
| 6.5            | 0.058   | 0.100  | 0.078    | 0.053         | 0.058 | 0.058 | 0.102            | 0.068 | 0.051 |
| 10.0           | 0.058   | 0.058  | 0.028    | 0.058         | 0.058 | 0.158 | 0.056            | 0.050 | 0.069 |
| 13.0           | 0.058   | 0.058  | 0.106    | 0.111         | 0.058 | 0.153 | 0.030            | 0.017 | 0.067 |
| 26.0           | 0.100   | 0.058  | 0.102    | 0.102         | 0.153 | 0.058 | 0.100            | 0.044 | 0.061 |

**Table S7-1.** The average of the data in Figure 2

| Amount(mmol/L) | Glucose | Xylose | Rhamnose | Glycolic acid | LaA  | FA  | Hydroxypropanone | HMF | FF  |
|----------------|---------|--------|----------|---------------|------|-----|------------------|-----|-----|
| 0.0            | 0.5     | 0.3    | 1.5      | 1.8           | 3.1  | 3.3 | 2.7              | 5.6 | 1.6 |
| 1.5            | 0.7     | 0.5    | 0.8      | 1.9           | 6.2  | 3.6 | 4.8              | 5.6 | 1.6 |
| 3.3            | 1.1     | 0.8    | 0.6      | 2.0           | 6.8  | 3.7 | 4.9              | 2.6 | 1.2 |
| 6.5            | 1.3     | 0.8    | 0.3      | 2.6           | 17.8 | 3.8 | 5.2              | 2.2 | 0.8 |
| 13.0           | 1.5     | 0.9    | 0.2      | 2.7           | 22.5 | 3.9 | 5.4              | 0.8 | 0.5 |
| 26.0           | 1.6     | 0.9    | 0.2      | 2.7           | 30.4 | 5.0 | 5.4              | 0.3 | 0.3 |
| 33.0           | 1.6     | 0.9    | 0.2      | 4.2           | 27.7 | 4.9 | 5.5              | 0.4 | 0.4 |
| 46.0           | 1.7     | 1.0    | 0.2      | 4.1           | 27.6 | 4.7 | 5.6              | 0.5 | 0.6 |

**Table S7-2.** The standard deviation of the data in Figure 2

| Amount(mmol/L) | Glucose | Xylose | Rhamnose | Glycolic acid | LaA   | FA    | Hydroxypropanone | HMF   | FF    |
|----------------|---------|--------|----------|---------------|-------|-------|------------------|-------|-------|
| 0.0            | 0.058   | 0.058  | 0.101    | 0.067         | 0.153 | 0.058 | 0.056            | 0.159 | 0.153 |
| 1.5            | 0.058   | 0.076  | 0.158    | 0.074         | 0.100 | 0.058 | 0.065            | 0.161 | 0.103 |
| 3.3            | 0.058   | 0.100  | 0.100    | 0.100         | 0.153 | 0.058 | 0.085            | 0.153 | 0.070 |
| 6.5            | 0.058   | 0.150  | 0.052    | 0.158         | 0.153 | 0.101 | 0.149            | 0.799 | 0.158 |
| 13.0           | 0.058   | 0.076  | 0.031    | 0.074         | 0.058 | 0.058 | 0.082            | 0.094 | 0.050 |
| 26.0           | 0.100   | 0.100  | 0.027    | 0.050         | 0.058 | 0.057 | 0.055            | 0.115 | 0.068 |
| 33.0           | 0.058   | 0.061  | 0.050    | 0.102         | 0.058 | 0.050 | 0.070            | 0.020 | 0.020 |
| 46.0           | 0.058   | 0.035  | 0.050    | 0.051         | 0.100 | 0.055 | 0.137            | 0.050 | 0.002 |

**Table S8-1.** The average of the data in Figure 3

| T(°C) | Glucose | Xylose | Rhamnose | Glycolic acid | LaA  | FA  | Hydroxypropanone | HMF | FF  |
|-------|---------|--------|----------|---------------|------|-----|------------------|-----|-----|
| 160°C | 9.2     | 4.8    | 2.0      | 2.1           | 11.8 | 4.8 | 4.9              | 1.5 | 1.0 |
| 180°C | 1.8     | 1.1    | 0.5      | 2.5           | 22.5 | 4.9 | 5.1              | 1.1 | 0.6 |
| 200°C | 1.6     | 0.9    | 0.2      | 2.7           | 30.4 | 5.0 | 5.4              | 0.3 | 0.3 |
| 220°C | 0.8     | 0.9    | 0.2      | 3.7           | 31.4 | 5.1 | 5.8              | 0.3 | 0.2 |
| 240°C | 0.8     | 0.7    | 0.1      | 3.2           | 28.9 | 4.5 | 5.5              | 0.2 | 0.1 |
| 260°C | 0.7     | 0.6    | 0.1      | 2.9           | 28.3 | 4.4 | 5.6              | 0.2 | 0.1 |
| 280°C | 0.6     | 0.6    | 0.1      | 2.5           | 25.3 | 4.8 | 6.2              | 0.2 | 0.1 |

**Table S8-2.** The standard deviation of the data in Figure 3

| T(°C) | Glucose | Xylose | Rhamnose | Glycolic acid | LaA   | FA    | Hydroxypropanone | HMF   | FF    |
|-------|---------|--------|----------|---------------|-------|-------|------------------|-------|-------|
| 160°C | 0.058   | 0.058  | 0.076    | 0.051         | 0.058 | 0.058 | 0.100            | 0.052 | 0.058 |
| 180°C | 0.076   | 0.100  | 0.058    | 0.100         | 0.100 | 0.058 | 0.058            | 0.058 | 0.058 |
| 200°C | 0.068   | 0.058  | 0.031    | 0.072         | 0.058 | 0.057 | 0.055            | 0.068 | 0.068 |
| 220°C | 0.058   | 0.058  | 0.000    | 0.058         | 0.058 | 0.000 | 0.058            | 0.058 | 0.058 |
| 240°C | 0.000   | 0.058  | 0.000    | 0.058         | 0.100 | 0.000 | 0.100            | 0.012 | 0.000 |
| 260°C | 0.058   | 0.000  | 0.000    | 0.058         | 0.100 | 0.058 | 0.058            | 0.000 | 0.000 |
| 280°C | 0.000   | 0.000  | 0.000    | 0.100         | 0.058 | 0.058 | 0.058            | 0.000 | 0.000 |

**Table S9-1.** The average of the data in Figure 4

| T(°C) | Glucose | Xylose | Rhamnose | Glycolic acid | LaA  | FA  | Hydroxypropanone | HMF | FF  |
|-------|---------|--------|----------|---------------|------|-----|------------------|-----|-----|
| 1.0   | 2.4     | 1.9    | 1.7      | 3.1           | 18.6 | 3.3 | 5.8              | 2.8 | 0.9 |
| 5.0   | 1.9     | 1.3    | 1.0      | 2.8           | 21.8 | 3.5 | 6.6              | 2.6 | 0.8 |
| 10.0  | 1.2     | 0.9    | 0.3      | 2.7           | 23.2 | 4.1 | 7.1              | 2.5 | 0.8 |
| 15.0  | 1.0     | 0.4    | 0.2      | 2.6           | 23.1 | 4.0 | 6.9              | 2.3 | 0.6 |
| 30.0  | 0.9     | 0.4    | 0.2      | 2.6           | 23.0 | 3.9 | 6.6              | 2.3 | 0.6 |
| 45.0  | 0.8     | 0.4    | 0.2      | 2.5           | 22.6 | 3.8 | 6.0              | 1.3 | 0.5 |
| 60.0  | 0.7     | 0.5    | 0.2      | 2.3           | 22.8 | 3.5 | 5.4              | 0.8 | 0.5 |
| 90.0  | 0.6     | 0.5    | 0.1      | 2.4           | 22.5 | 2.8 | 4.9              | 0.5 | 0.4 |

**Table S9-2.** The standard deviation of the data in Figure 4

| T(°C) | Glucose | Xylose | Rhamnose | Glycolic acid | LaA   | FA    | Hydroxypropanone | HMF   | FF    |
|-------|---------|--------|----------|---------------|-------|-------|------------------|-------|-------|
| 1.0   | 0.104   | 0.061  | 0.126    | 0.058         | 0.058 | 0.058 | 0.100            | 0.058 | 0.076 |
| 5.0   | 0.075   | 0.068  | 0.055    | 0.058         | 0.100 | 0.058 | 0.100            | 0.100 | 0.061 |
| 10.0  | 0.040   | 0.072  | 0.046    | 0.058         | 0.100 | 0.058 | 0.100            | 0.104 | 0.050 |
| 15.0  | 0.056   | 0.050  | 0.069    | 0.056         | 0.100 | 0.075 | 0.065            | 0.040 | 0.051 |
| 30.0  | 0.030   | 0.059  | 0.058    | 0.070         | 0.100 | 0.102 | 0.102            | 0.002 | 0.074 |
| 45.0  | 0.074   | 0.052  | 0.057    | 0.102         | 0.000 | 0.034 | 0.103            | 0.096 | 0.057 |
| 60.0  | 0.058   | 0.000  | 0.027    | 0.058         | 0.058 | 0.100 | 0.102            | 0.062 | 0.034 |
| 90.0  | 0.067   | 0.069  | 0.058    | 0.064         | 0.100 | 0.050 | 0.058            | 0.050 | 0.058 |



**Table S10-1.** The average of the data in Figure S1

| T(°C) | Glucose | Xylose | Rhamnose | Glycolic acid | LaA | FA  | Hydroxypropanone | HMF | FF  |
|-------|---------|--------|----------|---------------|-----|-----|------------------|-----|-----|
| 160°C | 1.7     | 4.5    | 3.2      | 0.5           | 1.4 | 1.6 | 1.7              | 0.1 | 0.1 |
| 180°C | 1.8     | 1.4    | 6.6      | 1.1           | 2.1 | 4.1 | 1.9              | 0.2 | 1.1 |
| 200°C | 2.8     | 1.0    | 1.5      | 1.8           | 3.1 | 4.2 | 2.7              | 4.4 | 1.6 |
| 220°C | 0.5     | 0.8    | 0.1      | 1.5           | 3.6 | 3.6 | 4.7              | 4.5 | 1.3 |
| 240°C | 0.4     | 0.3    | 0.1      | 1.3           | 3.8 | 2.1 | 6.0              | 2.4 | 0.8 |
| 260°C | 0.4     | 0.3    | 0.1      | 3.5           | 7.0 | 2.0 | 6.8              | 1.5 | 0.7 |
| 280°C | 0.3     | 0.2    | 0.1      | 3.9           | 8.1 | 1.3 | 7.7              | 0.3 | 0.5 |

**Table S10-2.** The standard deviation of the data in Figure S1

| T(°C) | Glucose | Xylose | Rhamnose | Glycolic acid | LaA   | FA    | Hydroxypropanone | HMF   | FF    |
|-------|---------|--------|----------|---------------|-------|-------|------------------|-------|-------|
| 160°C | 0.058   | 0.100  | 0.057    | 0.058         | 0.058 | 0.053 | 0.076            | 0.058 | 0.058 |
| 180°C | 0.058   | 0.058  | 0.033    | 0.058         | 0.058 | 0.058 | 0.058            | 0.013 | 0.058 |
| 200°C | 0.058   | 0.058  | 0.072    | 0.074         | 0.100 | 0.000 | 0.062            | 0.035 | 0.100 |
| 220°C | 0.058   | 0.066  | 1.076    | 0.100         | 0.058 | 0.061 | 0.050            | 0.007 | 0.058 |
| 240°C | 0.011   | 0.068  | 0.002    | 0.056         | 0.085 | 0.058 | 0.102            | 0.055 | 0.058 |
| 260°C | 0.000   | 0.058  | 0.000    | 0.104         | 0.100 | 0.058 | 0.058            | 0.058 | 0.058 |
| 280°C | 0.058   | 0.000  | 0.000    | 0.069         | 0.050 | 0.058 | 0.059            | 0.058 | 0.058 |

**Table S11-1.** The average of the data in Figure S2

| T(°C) | Glucose | Xylose | Rhamnose | Glycolic acid | LaA  | FA  | Hydroxypropanone | HMF | FF  |
|-------|---------|--------|----------|---------------|------|-----|------------------|-----|-----|
| 160°C | 8.5     | 5.5    | 6.9      | 1.9           | 7.5  | 6.0 | 4.3              | 0.6 | 0.9 |
| 180°C | 1.3     | 0.7    | 1.1      | 2.3           | 16.9 | 4.3 | 6.0              | 2.9 | 0.7 |
| 200°C | 0.7     | 0.5    | 0.2      | 2.3           | 22.5 | 3.9 | 5.4              | 0.8 | 0.5 |
| 220°C | 0.5     | 0.3    | 0.2      | 2.3           | 23.2 | 2.8 | 4.5              | 0.2 | 0.2 |
| 240°C | 0.6     | 0.6    | 0.1      | 2.1           | 27.7 | 1.9 | 4.4              | 0.1 | 0.4 |
| 260°C | 0.8     | 0.5    | 0.2      | 3.2           | 31.3 | 1.8 | 4.5              | 0.2 | 0.3 |
| 280°C | 0.7     | 0.5    | 0.1      | 2.5           | 25.1 | 1.9 | 4.6              | 0.1 | 0.3 |

**Table S11-2.** The standard deviation of the data in Figure S2

| T(°C) | Glucose | Xylose | Rhamnose | Glycolic acid | LaA   | FA    | Hydroxypropanone | HMF   | FF    |
|-------|---------|--------|----------|---------------|-------|-------|------------------|-------|-------|
| 160°C | 0.058   | 0.058  | 0.061    | 0.070         | 0.058 | 0.067 | 0.104            | 0.051 | 0.052 |
| 180°C | 0.100   | 0.058  | 0.104    | 0.073         | 0.100 | 0.058 | 0.102            | 0.107 | 0.070 |
| 200°C | 0.058   | 0.058  | 0.050    | 0.059         | 0.100 | 0.100 | 0.036            | 0.054 | 0.050 |
| 220°C | 0.100   | 0.058  | 0.050    | 0.051         | 0.100 | 0.058 | 0.058            | 0.065 | 0.045 |
| 240°C | 0.053   | 0.068  | 0.021    | 0.057         | 0.056 | 0.061 | 0.050            | 0.053 | 0.051 |
| 260°C | 0.062   | 0.051  | 0.050    | 0.059         | 0.100 | 0.123 | 0.103            | 0.024 | 0.050 |
| 280°C | 0.058   | 0.058  | 0.058    | 0.058         | 0.100 | 0.000 | 0.058            | 0.053 | 0.040 |

**Table S12-1.** The average of the data in Figure S3

| Time(min) | Glucose | Xylose | Rhamnose | Glycolic acid | LaA  | FA  | Hydroxypropanone | HMF | FF  |
|-----------|---------|--------|----------|---------------|------|-----|------------------|-----|-----|
| 1.0       | 1.5     | 1.1    | 1.1      | 3.6           | 25.4 | 3.3 | 5.1              | 0.6 | 0.7 |
| 5.0       | 1.2     | 0.9    | 0.8      | 3.5           | 26.5 | 3.4 | 5.4              | 0.5 | 0.6 |
| 10.0      | 0.9     | 0.8    | 0.5      | 3.3           | 27.4 | 3.6 | 5.7              | 0.3 | 0.6 |
| 15.0      | 0.7     | 0.6    | 0.2      | 3.2           | 27.4 | 3.5 | 5.4              | 0.2 | 0.5 |
| 30.0      | 0.6     | 0.6    | 0.2      | 2.9           | 27.3 | 3.4 | 5.1              | 0.2 | 0.5 |
| 45.0      | 0.7     | 0.5    | 0.2      | 3.0           | 27.6 | 3.2 | 4.8              | 0.1 | 0.4 |
| 60.0      | 0.6     | 0.6    | 0.1      | 2.1           | 27.7 | 1.9 | 4.7              | 0.1 | 0.4 |
| 90.0      | 0.6     | 0.7    | 0.2      | 2.5           | 27.3 | 1.8 | 4.7              | 0.1 | 0.2 |

**Table S12-2.** The standard deviation of the data in Figure S3

| Time(min) | Glucose | Xylose | Rhamnose | Glycolic acid | LaA   | FA    | Hydroxypropanone | HMF   | FF    |
|-----------|---------|--------|----------|---------------|-------|-------|------------------|-------|-------|
| 1.0       | 0.100   | 0.058  | 0.100    | 0.000         | 0.100 | 0.058 | 0.100            | 0.058 | 0.058 |
| 5.0       | 0.058   | 0.058  | 0.115    | 0.076         | 0.058 | 0.052 | 0.100            | 0.058 | 0.058 |
| 10.0      | 0.058   | 0.058  | 0.058    | 0.040         | 0.058 | 0.072 | 0.058            | 0.058 | 0.050 |
| 15.0      | 0.100   | 0.058  | 0.058    | 0.062         | 0.053 | 0.058 | 0.058            | 0.058 | 0.058 |
| 30.0      | 0.058   | 0.058  | 0.000    | 0.101         | 0.151 | 0.067 | 0.058            | 0.000 | 0.000 |
| 45.0      | 0.058   | 0.058  | 0.058    | 0.035         | 0.058 | 0.030 | 0.100            | 0.011 | 0.073 |
| 60.0      | 0.045   | 0.040  | 0.058    | 0.060         | 0.100 | 0.100 | 0.058            | 0.005 | 0.021 |
| 90.0      | 0.058   | 0.100  | 0.058    | 0.057         | 0.062 | 0.058 | 0.000            | 0.027 | 0.012 |
